# Supplementary material for: Packing polymorphism of a two-dimensional copper(i) 3-amino-1,2,4-triazolate coordination polymer
Source: Royal Society of Chemistry journal article supplement (doi:10.1039/c1ce05230f), 2011-01-01
Supplement: c1ce05230f.pdf [file c1ce05230f.pdf]

Supporting Information for

## Packing polymorphism of two-dimensional coordination polymer cuprous 3-amino-1,2,4-triazolate

Da Chen, Yi-Jiang Liu, Yan-Yong Lin, Jie-Peng Zhang,\* and Xiao-Ming Chen

MOE Key Laboratory of Bioinorganic and Synthetic Chemistry, State Key Laboratory of Optoelectronic Materials and Technologies, School of Chemistry and Chemical Engineering, Sun Yat-Sen University, Guangzhou 510275, P. R. China. Fax: +86 20 84112245; Tel: +86 20 84113986; E-mail: zhangjp7@mail.sysu.edu.cn

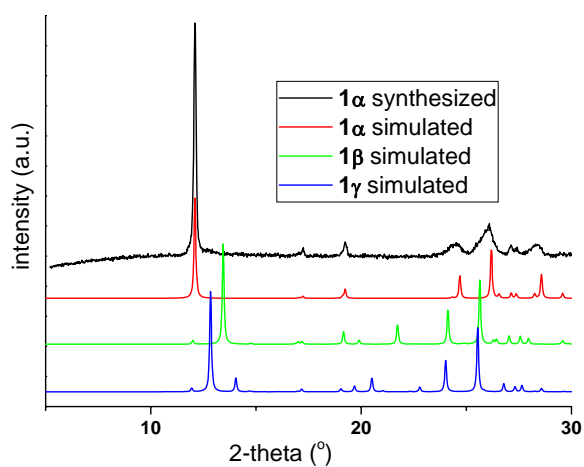

**Fig. S1** Simulated and experimental XRPD patterns of **1** prepared by rapid solution mixing method.

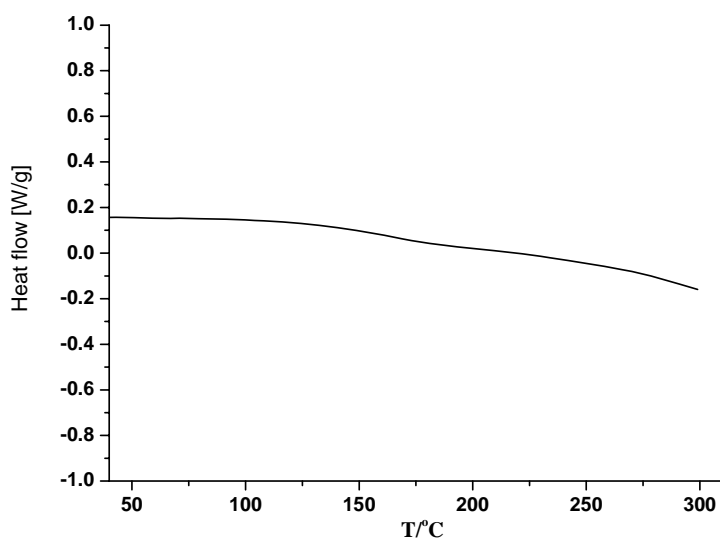

**Fig. S2** DSC curve of **1** showing no phase transition.

**Table S1.** Selected bond lengths (Å) and angles (°) for **1 $\alpha$** , **1 $\beta$** , and **1 $\gamma$** .

| <b>1<math>\alpha</math></b> |          |           |          |
|-----------------------------|----------|-----------|----------|
| Cu1-N1                      | 1.960(7) | N1-Cu1-N2 | 115.4(3) |
| Cu1-N2                      | 1.970(7) | N1-Cu1-N3 | 121.9(3) |
| Cu1-N3                      | 1.958(7) | N2-Cu1-N3 | 121.6(3) |
| <b>1<math>\beta</math></b>  |          |           |          |
| Cu1-N1                      | 1.942(4) | N1-Cu1-N6 | 114.4(2) |
| Cu1-N6                      | 1.973(4) | N1-Cu1-N3 | 122.0(2) |
| Cu1-N3                      | 1.959(4) | N3-Cu1-N6 | 123.4(2) |
| Cu2-N5                      | 1.955(4) | N2-Cu2-N5 | 114.3(2) |
| Cu2-N2                      | 1.989(4) | N5-Cu2-N7 | 122.7(2) |
| Cu2-N7                      | 1.949(4) | N2-Cu2-N7 | 119.6(2) |
| <b>1<math>\gamma</math></b> |          |           |          |
| Cu1-N1                      | 1.980(3) | N1-Cu1-N6 | 113.9(1) |
| Cu1-N6                      | 1.989(3) | N1-Cu1-N3 | 122.0(1) |
| Cu1-N3                      | 1.977(3) | N3-Cu1-N6 | 123.9(1) |
| Cu2-N5                      | 1.965(4) | N2-Cu2-N5 | 114.0(1) |
| Cu2-N2                      | 1.988(3) | N5-Cu2-N7 | 123.8(1) |
| Cu2-N7                      | 1.964(3) | N2-Cu2-N7 | 118.8(1) |

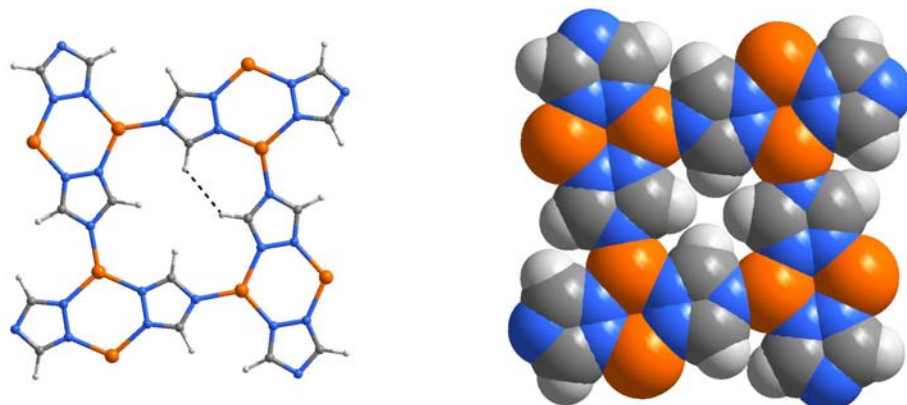

**Fig. S3** Ball-and-stick (left, dash line = 2.5 Å) and space-filling (right) presentations of interaction between adjacent hydrogen atoms in [Cu(tz)].

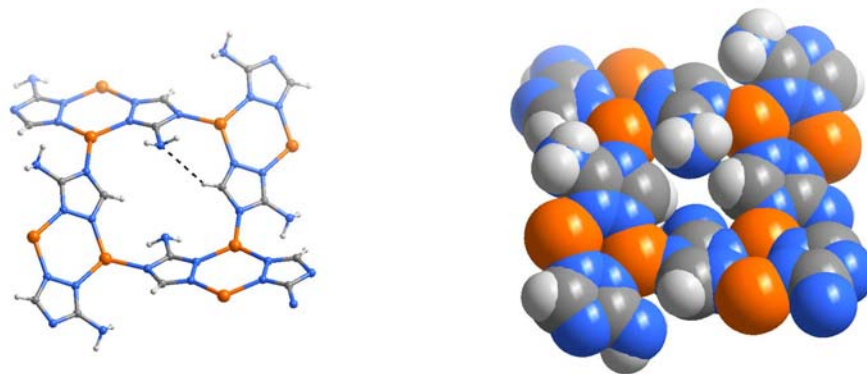

**Fig. S4** Ball-and-stick (left, dash line = 2.7 Å) and space-filling (right) presentations of interaction between adjacent hydrogen atoms and amino groups in **1**.
